# Supplementary material
Source: publisher figshare collection journal article supplement (https://asha.figshare.com/articles/dataset/_/26506102)
Supplement: Supplementary file 1 [file 1]

**Supplemental Material S2.** Select outcome measures and instruments used in studies of AAC interventions in critical & acute care.

|                                |                                                                                                                                                                                                                                                                                                                                                                                                                                                                                                  |
|--------------------------------|--------------------------------------------------------------------------------------------------------------------------------------------------------------------------------------------------------------------------------------------------------------------------------------------------------------------------------------------------------------------------------------------------------------------------------------------------------------------------------------------------|
| Anxiety and Comfort            | <p>State Anxiety Inventory (Spielberger et al., 1971; Yavuz &amp; Gursoy, 2021)</p> <p>Hospital Anxiety and Depression Scale (Hossieni et al., 2018; Koszalinski et al., 2019; Snaith, 2003)</p> <p>Anxiety Hamilton Scale (Erfan et al., 2018; Hamilton, 1959)</p> <p>Faces Anxiety Scale (McKinley et al., 2004)</p> <p>Perianesthesia Comfort Scale (Kolcaba &amp; Kolcaba, 1991; Wilson &amp; Kolcaba, 2004; Yavuz &amp; Gursoy, 2021)</p>                                                   |
| Pain                           | <p>Behavioural Pain Scale (Payen et al., 2021; Ull et al., 2020)</p> <p>Visual Analog Scale for Pain (VAS Pain) (Hawker et al., 2011; Ull et al., 2020)</p> <p>Numeric Rating Scale for Pain (NRS Pain) (Hawker et al., 2011; Ull et al., 2020)</p> <p>Patient Communication Tool (El-Soussi et al., 2014; Patak et al., 2006)</p> <p>Nurse Communication Survey (Happ et al., 2015; Sereika et al., 2008)</p>                                                                                   |
| Sedation, Confusion, Agitation | <p>Richmond Agitation Sedation Scale (RASS) (Ely et al., 2003; Garry et al., 2016; Rodriguez et al., 2012; Sessler et al., 2002; Ull et al., 2020)</p> <p>Confusion Assessment Method for the Intensive Care Unit (CAM-ICU) (Ely et al., 2003; Garry et al., 2016; Rodriguez et al., 2012; Sessler et al., 2002)</p> <p>Glasgow Coma Scale (Happ et al., 2015; Teasdale &amp; Jennett, 1974; Yavuz &amp; Gursoy, 2021)</p> <p>Coma-free days (Happ et al., 2015; Pandharipande et al., 2007)</p> |

|                                                                  |                                                                                                                                                                                                                                                                                                                                                                                                                                                                                                                                                                                               |
|------------------------------------------------------------------|-----------------------------------------------------------------------------------------------------------------------------------------------------------------------------------------------------------------------------------------------------------------------------------------------------------------------------------------------------------------------------------------------------------------------------------------------------------------------------------------------------------------------------------------------------------------------------------------------|
| <p>Psychosocial Impact and Quality of Life</p>                   | <p>Voice-Related Quality of Life (V-RQOL) (Haring et al., 2021; Hogikyan &amp; Sethuraman, 1999)</p> <p>European Quality of Life 5 Dimensions 5 Level Score (EQ-5D-5L) (Herdman et al., 2011; Ull et al., 2020)</p> <p>Psychosocial Impact of Assistive Devices Scale (Garry et al., 2016; Hy, 1996; Jutai &amp; Day, 2002; Jutai et al., 2000; Calgari et al., 2013)</p> <p>Visual analogue self-esteem scale (VASES) (Brumfitt &amp; Sheeran, 1999; Ull et al., 2020)</p>                                                                                                                   |
| <p>Communication Ease, Satisfaction, Suitability Perceptions</p> | <p>Ease of Communication Scale (Happ et al., 2004, 2014; Hossieni et al., 2018; Menzel, 1998; Montazeri et al., 2003; Trotta et al., 2020)</p> <p>The Communication Satisfaction Scale (Tantacharoenat et al., 2018)</p> <p>The Suitability for Use Scale (Tantacharoenat et al., 2018)</p> <p>Patient Satisfaction and Usability Instrument (Demers et al., 1999, 2002; Rodriguez &amp; Rowe, 2010; Rodriguez et al., 2012)</p> <p>Usability of Communication Intervention Form (Rodriguez &amp; Rowe, 2010; Rodriguez et al., 2012)</p> <p>Patient Perception Scale (Kaur et al., 2018)</p> |
| <p>Communication Frequency, Quality, Success</p>                 | <p>Needs Expression Assessment Questionnaire (Erfan et al., 2018)</p> <p>Ratings of aggregated nurse-patient communication acts (Burgio et al., 2001; De los Ríos Castillo &amp; Sánchez-Sosa, 2002; Happ et al., 2014; Morse et al., 2003; Topf, 1986)</p> <p>Communication frequency (Ashworth, 1980, Garrett &amp; Beukelman, 1995; Garrett &amp; Huth, 2002; Happ et al., 2014; Light et al., 1992)</p> <p>Communication quality according to total positive and negative nurse behaviors and</p>                                                                                         |

|                                  |                                                                                                                                                                                                                                                                                                                                                             |
|----------------------------------|-------------------------------------------------------------------------------------------------------------------------------------------------------------------------------------------------------------------------------------------------------------------------------------------------------------------------------------------------------------|
|                                  | <p>rate of AAC use (De los Ríos Castillo &amp; Sánchez-Sosa, 2002; Hall, 1996; Happ et al., 2014; Salyer &amp; Stuart, 1985)</p> <p>Communication success (Garrett &amp; Beukelman, 1995; Garrett &amp; Huth, 2002; Happ et al., 2014; Light et al., 1992)</p> <p>Communication transcription coding (Calculator &amp; Luchko, 1983; Happ et al., 2014)</p> |
| Communication Methods Used       | <p>The Communication Methods Checklist (Happ et al., 2004; Menzel, 1998)</p> <p>Communication Observation Form (Otuzoglu &amp; Karahan, 2014; Patak et al., 2006; Yavuz &amp; Gursoy, 2021)</p>                                                                                                                                                             |
| Duration of Ventilation and Cost | Ventilator-free days and cost of ventilation duration (Happ et al., 2015; Rubenfeld et al., 1999; Seaman et al., 2012)                                                                                                                                                                                                                                      |

## References

- Ashworth, P. M. (1980). *Care to communicate: An investigation into problems of communication between patients and nurses in intensive therapy units*. Royal College of Nursing of the United Kingdom.
- Brumfitt, S. M., & Sheeran, P. (1999). The development and validation of the Visual Analogue Self-Esteem Scale (VASES). *British Journal of Clinical Psychology*, 38(4), 387-400.
- Burgio, L. D., Allen-Burge, R., Roth, D. L., Bourgeois, M. S., Dijkstra, K., Gerstle, J., & Bankester, L. (2001). Come talk with me: Improving communication between nursing assistants and nursing home residents during care routines. *The Gerontologist*, 41(4), 449-460.
- Calculator, S., & Luchko, C. D. A. (1983). Evaluating the effectiveness of a communication board training program. *Journal of Speech and Hearing Disorders*, 48(2), 185-191.
- Caligari, M., Godi, M., Guglielmetti, S., Franchignoni, F., & Nardone, A. (2013). Eye tracking communication devices in amyotrophic lateral sclerosis: Impact on disability and quality of life. *Amyotrophic Lateral Sclerosis and Frontotemporal Degeneration*, 14(7-8), 546-552.
- De los Ríos Castillo, J. L., & Sánchez-Sosa, J. J. (2002). Well-being and medical recovery in the critical care unit: The role of the nurse-patient interaction. *Salud Mental*, 25(2), 21-31.

- Demers, L., Wessels, R. D., Weiss-Lambrou, R., Ska, B., & De Witte, L. P. (1999). An international content validation of the Quebec User Evaluation of Satisfaction with assistive Technology (QUEST). *Occupational Therapy International*, 6(3), 159-175.
- Demers, L., Monette, M., Lapierre, Y., Arnold, D. L., & Wolfson, C. (2002). Reliability, validity, and applicability of the Quebec User Evaluation of Satisfaction with assistive Technology (QUEST 2.0) for adults with multiple sclerosis. *Disability and Rehabilitation*, 24(1-3), 21-30.
- El-Soussi, A., Elshfey, M., Othman, S., & Reshia, F. (2014). Augmented alternative communication methods in intubated COPD patients: Does it make difference. *Egyptian Journal of Chest Diseases and Tuberculosis*, 64. <https://doi.org/10.1016/j.ejcdt.2014.07.006>
- Ely, E. W., Truman, B., Shintani, A., Thomason, J. W., Wheeler, A. P., Gordon, S., & Bernard, G. R. (2003). Monitoring sedation status over time in ICU patients: Reliability and validity of the Richmond Agitation-Sedation Scale (RASS). *Jama*, 289(22), 2983-2991.
- Erfan, N. M., Sobeih, H.S., Ameen, D.A. (2018). Effect of using nonverbal communication method versus traditional methods toward expressing needs and satisfaction for mechanically ventilated patients. *IOSR Journal of Nursing and Health Science*, 7(1).
- Garrett, K. L., & Beukelman, D. R. (1995). Changes in the interaction patterns of an individual with severe aphasia given three types of partner support. *Clinical Aphasiology*, 23, 237-251.
- Garrett, K. L., & Huth, C. (2002). The impact of graphic contextual information and instruction on the conversational behaviours of a person with severe aphasia. *Aphasiology*, 16(4-6), 523-536.
- Garry, J., Casey, K., Cole, T. K., Regensburg, A., McElroy, C., Schneider, E., Efron, D., & Chi, A. (2016). A pilot study of eye-tracking devices in intensive care. *Surgery*, 159(3), 938-944. <https://doi.org/10.1016/j.surg.2015.08.012>
- Hall, D. S. (1996). Interactions between nurses and patients on ventilators. *American Journal of Critical Care*, 5(4), 293-297.
- Happ, M. B., Roesch, T. K., & Garrett, K. (2004). Electronic voice-output communication aids for temporarily nonspeaking patients in a medical intensive care unit: A feasibility study. *Heart & Lung*, 33(2), 92-101. <https://doi.org/10.1016/j.hrtlng.2003.12.005>
- Happ, M. B., Garrett, K. L., Tate, J. A., DiVirgilio, D., Houze, M. P., Demirci, J. R., George, E., & Sereika, S. M. (2014). Effect of a multi-level intervention on nurse patient communication in the intensive care unit: Results of the SPEACS trial. *Heart & Lung*, 43(2), 89-98. <https://doi.org/10.1016/j.hrtlng.2013.11.010>
- Happ, M. B., Sereika, S. M., Houze, M. P., Seaman, J. B., Tate, J. A., Nilsen, M. L., van Panhuis, J., Scullin, A., Baumann, B. M., George, E., Angus, D. C., & Barnato, A. E. (2015). Quality of care and resource use among mechanically ventilated patients before

- and after an intervention to assist nurse-nonvocal patient communication. *Heart & Lung*, 44(5), 408-415. <https://doi.org/10.1016/j.hrtlng.2015.07.001>
- Hamilton, M. (1959). The assessment of anxiety states by rating. *British journal of medical psychology*.
- Haring, C. T., Farlow, J. L., Leginza, M., Vance, K., Blakely, A., Lyden, T., Hoesli, R. C., Neal, M. E. H., Brenner, M. J., Hogikyan, N. D., Morrison, R. J., & Casper, K. A. (2021). Effect of augmentative technology on communication and quality of life after tracheostomy or total laryngectomy. *Otolaryngology-Head and Neck Surgery*, 6. <https://doi.org/10.1177/01945998211013778>
- Hawker GA, Mian S, Kendzerska T, & French, M. (2011). Measures of adult pain: Visual Analog Scale for Pain (VAS Pain), Numeric Rating Scale for Pain (NRS Pain), McGill Pain Questionnaire (MPQ), Short-Form McGill Pain Questionnaire (SF-MPQ), Chronic Pain Grade Scale (CPGS), Short Form-36 Bodily Pain Scale (SF-36 BPS), and Measure of Intermittent and Constant Osteoarthritis Pain (ICOAP). *Arthritis Care & Research*, 63(S11), S240–S252.
- Herdman, M., Gudex, C., Lloyd, A., Janssen, M. F., Kind, P., Parkin, D., Bonse, G., & Badia, X. (2011). Development and preliminary testing of the new five-level version of EQ-5D (EQ-5D-5L). *Quality of Life Research*, 20, 1727-1736.
- Hogikyan, N. D., & Sethuraman, G. (1999). Validation of an instrument to measure voice-related quality of life (V-RQOL). *Journal of voice*, 13(4), 557-569.
- Hosseini, S. R., Valizad-Hasanloei, M. A., & Feizi, A. (2018). The effect of using communication boards on ease of communication and anxiety in mechanically ventilated conscious patients admitted to intensive care units. *Iranian Journal of Nursing and Midwifery Research*, 23(5), 358-362. [https://doi.org/10.4103/ijnmr.IJNMR\\_68\\_17](https://doi.org/10.4103/ijnmr.IJNMR_68_17)
- Hy, D. A. Y. (1996). Measuring the psychosocial impact of assistive devices: the PIADS. *Canadian Journal of Rehabilitation*, 9(2), 159-168.
- Jutai, J., & Day, H. (2002). Psychosocial impact of assistive devices scale (PIADS). *Technology and Disability*, 14(3), 107-111.
- Jutai, J., Woolrich, W., Campbell, K., Gryfe, P., & Day, H. (2000). User-caregiver agreement on perceived psychosocial impact of assistive devices. *Proceedings of RESNA* (pp. 328-330).
- Kaur, S., Agnihotri, M., Dhandapani, M., Gopichandran, L., Mukherjee, K. K., & Dhandapani, S. (2018). Effectiveness of communication chart on patient satisfaction among conscious intubated patients: A randomized controlled trial. *Journal of Nursing Science & Practice*, 8, 15-23.
- Kolcaba, K. Y., & Kolcaba, R. J. (1991). An analysis of the concept of comfort. *Journal of Advanced Nursing*, 16(11), 1301-1310.

- Koszalinski, R. S., Heidel, R. E., Hutson, S. P., Li, X. P., Palmer, T. G., McCarthy, J., Hollibush, T., Massoli, J., Simmons, A., Jagirdar, N., & Rajashekaran, P. V. (2019). The use of communication technology to affect patient outcomes in the intensive care unit. *Computers Informatics Nursing*, 38(4), 183-189.
- Light, J., Dattilo, J., English, J., Gutierrez, L., & Hartz, J. (1992). Instructing facilitators to support the communication of people who use augmentative communication systems. *Journal of Speech, Language, and Hearing Research*, 35(4), 865-875.
- McKinley, S., Stein-Parbury, J., Chehelhab, A., & Lovas, J. (2004). Assessment of anxiety in intensive care patients by using the Faces Anxiety Scale. *American Journal of Critical Care*, 13(2), 146-152.
- Menzel, L.K. (1998). Factors related to the emotional responses of intubated patients to being unable to speak. *Heart and Lung*, 27(4), 245-52.
- Montazeri, A., Vahdaninia, M., Ebrahimi, M., & Jarvandi, S. (2003). The Hospital Anxiety and Depression Scale (HADS): Translation and validation study of the Iranian version. *Health and Quality of Life Outcomes*, 1(1), 1-5.
- Morse, J. M., Beres, M. A., Spiers, J. A., Mayan, M., & Olson, K. (2003). Identifying signals of suffering by linking verbal and facial cues. *Qualitative Health Research*, 13(8), 1063-1077.
- Otuzoglu, M., & Karahan, A. (2014). Determining the effectiveness of illustrated communication material for communication with intubated patients at an intensive care unit. *International Journal of Nursing Practice*, 20(5), 490-498. <https://doi.org/10.1111/ijn.12190>
- Pandharipande, P. P., Pun, B. T., Herr, D. L., Maze, M., Girard, T. D., Miller, R. R., & Ely, E. W. (2007). Effect of sedation with dexmedetomidine vs lorazepam on acute brain dysfunction in mechanically ventilated patients: The MENDS randomized controlled trial. *Jama*, 298(22), 2644-2653.
- Patak, L., Gawlinski, A., Fung, N. I., Doering, L., Berg, J., & Henneman, E. A. (2006). Communication boards in critical care: Patients' views. *Applied Nursing Research*, 19(4), 182-190.
- Payen, J. F., Bru, O., Bosson, J. L., Lagrasta, A., Novel, E., Deschaux, I., Lavagne, P., & Jacquot, C. (2001). Assessing pain in critically ill sedated patients by using a behavioral pain scale. *Critical Care Medicine*, 29(12), 2258-2263.
- Pun, B. T., Gordon, S. M., Peterson, J. F., Shintani, A. K., Jackson, J. C., Foss, J., Harding, S., Bernard, G., Dittus, R., & Ely, E. W. (2005). Large-scale implementation of sedation and delirium monitoring in the intensive care unit: a report from two medical centers. *Critical Care Medicine*, 33(6), 1199-1205.
- Rodriguez, C., & Rowe, M. (2010). Use of a speech-generating device for hospitalized postoperative patients with head and neck cancer experiencing speechlessness. *Oncology Nursing Forum*, 37(2), 199-205.

- Rodriguez, C. S., Rowe, M., Koeppel, B., Thomas, L., Troche, M. S., & Paguio, G. (2012). Development of a communication intervention to assist hospitalized suddenly speechless patients. *Technology and Health Care*, 20(6), 489-500. <https://doi.org/10.3233/thc-2012-0695>
- Rubinfeld G.D., Angus D.C., Pinsky M.R., & Members of the Outcomes Research Workshop. (1999). Outcomes research in critical care: Results of the American Thoracic Society critical care assembly workshop on outcomes research. *American Journal of Respiratory and Critical Care Medicine*, 160(1), 358-367.
- Salyer, J., & Stuart, B. J. (1985). Nurse-patient interaction in the intensive care unit. *Heart & Lung: The Journal of Critical Care*, 14(1), 20-24.
- Seaman J.B., Happ M.B., Sereika S., Barnato A.E. (2012, September). *Development and testing of a data collection instrument for quality of care data*. [Conference Proceeding]. Council for the Advancement of Nursing Science, State of the Science Congress, Washington, D.C, United States.
- Sereika, S., Tate, J., Happ, M. B., & Garrett, K. (2008). *Nurses' attitudes and perceptions about communication with nonspeaking ICU patients*. [Unpublished manuscript]. University of Pittsburgh, School of Nursing.
- Sessler, C. N., Gosnell, M. S., Grap, M. J., Brophy, G. M., O'Neal, P. V., Keane, K. A., Tesoro, E.P., & Elswick, R. K. (2002). The Richmond Agitation-Sedation Scale: Validity and reliability in adult intensive care unit patients. *American Journal of Respiratory and Critical Care Medicine*, 166(10), 1338-1344.
- Spielberger, C. D., Gonzalez-Reigosa, F., Martinez-Urrutia, A., Natalicio, L. F., & Natalicio, D. S. (1971). Development of the Spanish edition of the state-trait anxiety inventory. *Interamerican Journal of Psychology*, 5, 145-158.
- Snaith, R. P. (2003). The Hospital Anxiety and Depression Scale. *Health and Quality of Life Outcomes*, 1, 1-4.
- Tantachoenrat, C., Prasopkittikun, T., Rungamornrat, S., & Limprayoon, K. (2018). Use of a user-friendly tablet application to communicate with pediatric patients on mechanical ventilators. *Aquichan*, 18(3), 275-286. <https://doi.org/10.5294/aqui.2018.18.3.3>
- Teasdale, G., & Jennett, B. (1974). Assessment of coma and impaired consciousness: A practical scale. *The Lancet*, 304(7872), 81-84.
- Thomas, L. H., MacMillan, J., McColl, E., Priest, J., Hale, C., & Bond, S. (1995). Obtaining patients' views of nursing care to inform the development of a patient satisfaction scale. *International Journal for Quality in Health Care*, 7(2), 153-163.
- Topf, M. (1986). Three estimates of interrater reliability for nominal data. *Nursing Research*, 35(4), 253.

- Trotta, R. L., Hermann, R. M., Polomano, R. C., & Happ, M. B. (2020). Improving nonvocal critical care patients' ease of communication using a modified SPEACS-2 program. *Journal for Healthcare Quality*, 42(1), E1-E9. <https://doi.org/10.1097/jhq.0000000000000163>
- Truman, B., & Ely, E. W. (2003). Using the Confusion Assessment Method for the intensive care unit. *Critical Care Nurse*, 23(2), 25-37.
- Ull, C., Weckwerth, C., Schildhauer, T. A., Hamsen, U., Gaschler, R., Waydhas, C., & Jansen, O. (2020). First experiences of communication with mechanically ventilated patients in the intensive care unit using eye-tracking technology. *Disability and Rehabilitation: Assistive Technology*, 1(6). <https://doi.org/10.1080/17483107.2020.1821106>
- Wilson, L., & Kolcaba, K. (2004). Practical application of comfort theory in the perianesthesia setting. *Journal of Perianesthesia Nursing*, 19(3), 164-173.
- Yavuz, M. E., & Gursoy, A. (2021). Computer-based communication tool provides effective communication for non-speaking patients: A quasi-experimental study. *Clinical Nursing Research*, 10. 10547738211038638. <https://doi.org/10.1177/10547738211038638>
