# Supplementary material
Source: publisher figshare collection journal article supplement (https://asha.figshare.com/articles/dataset/_/26506102)
Supplement: Supplementary file 2 [file 1]

# **Supplemental Material S1. Search terms for each database.**

| Database             | Search Strategy                                                                                                                                                               | Yield |
|----------------------|-------------------------------------------------------------------------------------------------------------------------------------------------------------------------------|-------|
| Web of Science       | TS=(mechanical ventil*) AND TS=(augmentative alternative communication)                                                                                                       | 16    |
|                      | ((ALL=(augmentative alternative communication)) OR ALL=(communication aid)) AND ALL=(intensive care unit)                                                                     | 160   |
|                      | ((TS=(augmentative alternative communication)) OR TS=(communication aid)) AND TS=(intensive care unit)                                                                        | 1     |
|                      | (TS=(mechanical ventilation)) AND TS=(Augmentative and alternative communication)                                                                                             | 16    |
|                      | (TS=("patient provider communication" )) AND TS=("intensive care")                                                                                                            | 18    |
|                      | (TS=("nurse communication" )) AND TS=("intensive care")                                                                                                                       | 24    |
|                      | (TS=(communication )) AND TS=(mechanical ventilation)                                                                                                                         | 555   |
|                      | (TS=(tracheostomy)) AND TS=(communication )                                                                                                                                   | 241   |
| PubMed               | ("Communication Aids for Disabled"[Mesh]) AND "Intensive Care Units"[Mesh]                                                                                                    | 9     |
|                      | ("Tracheostomy"[Mesh]) AND "Communication Aids for Disabled"[Mesh]                                                                                                            | 7     |
|                      | ("Respiration, Artificial"[Mesh]) AND "Nonverbal Communication"[Mesh]                                                                                                         | 40    |
|                      | ("Nonverbal Communication"[Mesh]) AND "Critical Care"[Mesh]                                                                                                                   | 46    |
|                      | ("Respiration, Artificial"[Mesh]) AND "Communication Aids for Disabled"[Mesh]                                                                                                 | 12    |
|                      | ("Nurse-Patient Relations"[Mesh]) AND "Communication Aids for Disabled"[Mesh]                                                                                                 | 22    |
| APA PsycINFO (EBSCO) | ALL "augmentative and alternative communication" or "aac" or "communication device" AND ALL "mechanical ventilation" or "mechanically ventilated" or "artificial ventilation" | 5     |
|                      | SU ("augmentative and alternative communication" or "aac" or "communication device" ) AND SU ( "intensive care unit" or "icu" or "critical care" or "critical care unit" )    | 3     |
|                      | AB "communication strategies" AND AB "mechanical ventilation"                                                                                                                 | 2     |
|                      | SU "communication strategies" AND SU "mechanical ventilation"                                                                                                                 | 2     |

|                                  |                                                                                                                                                                                     |    |
|----------------------------------|-------------------------------------------------------------------------------------------------------------------------------------------------------------------------------------|----|
|                                  | SU (tracheostomy or tracheotomy or trach or trache or trachy ) AND SU communication                                                                                                 | 21 |
|                                  | SU "augmentative and alternative communication" or "aac" or "communication device" AND SU "acute care" or "acute setting" or "acute hospital" or "inpatient"                        | 0  |
|                                  | ALL "augmentative and alternative communication" or "aac" or "communication device" AND ALL "acute care" or "acute setting" or "acute hospital" or "inpatient"                      | 11 |
| Academic Search Complete (EBSCO) | SU ( "augmentative and alternative communication" or "aac" or "communication device" ) AND SU ( "mechanical ventilation" or "mechanically ventilated" or "artificial ventilation" ) | 0  |
|                                  | SU ( "augmentative and alternative communication" or "aac" or "communication device" ) AND AB ( "mechanical ventilation" or "mechanically ventilated" or "artificial ventilation" ) | 0  |
|                                  | SU ( "augmentative and alternative communication" or "aac" or "communication device" ) AND SU ( "intensive care unit" or "icu" or "critical care" or "critical care unit" )         | 0  |
|                                  | "communication strategies" AND ( "mechanical ventilation" or "mechanically ventilated" or "artificial ventilation" or "intubated" or "intubation" or "ventilator" )                 | 18 |
